# Supplementary material for: Research on Aeolian Sand Erosion and Deposition Patterns in the Arid Region of the Xiliugou Tributary on the Upper Reaches of Yellow River within Inner Mogolia
Source: Preprints.org preprint supplement (doi:10.20944/preprints202305.0994.v1), 2023-05-15
Supplement: Supplementary file 1 [file supplementary]

## **Supplementary Material for**

### **Investigating Aeolian Sand Erosion in the Arid Region of Xiliugou Tributary**

Hongsheng Zhao<sup>1,2,3</sup>, Shuang Feng<sup>1,2</sup>, Xiaohong Dang<sup>1,2,3</sup>, Zhongju Meng<sup>1,2,3</sup>, Zhengxin Chen<sup>4</sup>, Yong Gao<sup>1,2,3\*</sup>

<sup>1</sup>College of Desert Management, Inner Mongolia Agricultural University, Hohhot 010018, Inner Mongolia, China

<sup>2</sup>Water conservancy Science Research Institute of Inner Mongolia, Hohhot 010051, Inner Mongolia, China

<sup>3</sup>Inner Mongolia Hangjin Desert Ecological Position Research Station, Ordos 017400, Inner Mongolia, China

<sup>4</sup>Water Conservancy Academy of Inner Mongolia Autonomous Region, Hohhot 010020, Inner Mongolia, China;

First author: Hongsheng Zhao (1995-), The Han nationality; Doctoral student; Inner Mongolia Agricultural University; Direction: Desertification control; Email: [13474804273@163.com](mailto:13474804273@163.com); Zip code: 010010

Second author: Shuang Feng (1995-), The Han nationality; Doctoral student; Inner Mongolia Agricultural University; Direction: Soil and water conservation; Email: [1279852113@qq.com](mailto:1279852113@qq.com); Zip code: 010010

Third author: Xiaohong Dang (1986-), The Han nationality; Associate professor; Doctoral student; Inner Mongolia Agricultural University; Direction: Desertification control; Email: [dangxiaohong1986@126.com](mailto:dangxiaohong1986@126.com); Zip code: 010010

Fourth author: Zhongju Meng (1980-), The Han nationality; The professor; Doctoral student; Inner Mongolia Agricultural University; Direction: Desertification control; Email: [mengzhongju@126.com](mailto:mengzhongju@126.com); Zip code: 010010

Fifth author: Zhengxin Chen (1963-), The Han nationality; A researcher; Bachelor of Science in Agriculture; Inner Mongolia Water Conservancy Research Institute; Direction: Soil and water conservation; Email: [xincz-nmg@163.com](mailto:xincz-nmg@163.com); Zip code: 010052

Corresponding author\*: Yong Gao (1962-), The Han nationality; The professor; Doctoral student; Inner Mongolia Agricultural University; Direction: Desertification control; Email: [13948815709@163.com](mailto:13948815709@163.com); Zip code: 010010

Supporting Fund: 1. A major special project of the "Science and Technology to Benefit Mongolia" Action "Spatial Heterogeneity of the Underlying surface of Ten Tributaries and the Transport law of Wind-blown Sand" (No.: KJXM-EEDS-2020006) 2. Water Conservancy Science and Technology Project of Inner Mongolia Autonomous Region - Key technologies of zonal optimal quantitative allocation of water and soil conservation measures in Ten Tributaries based on maximum effect of water and sediment regulation (No.: NSK202102)

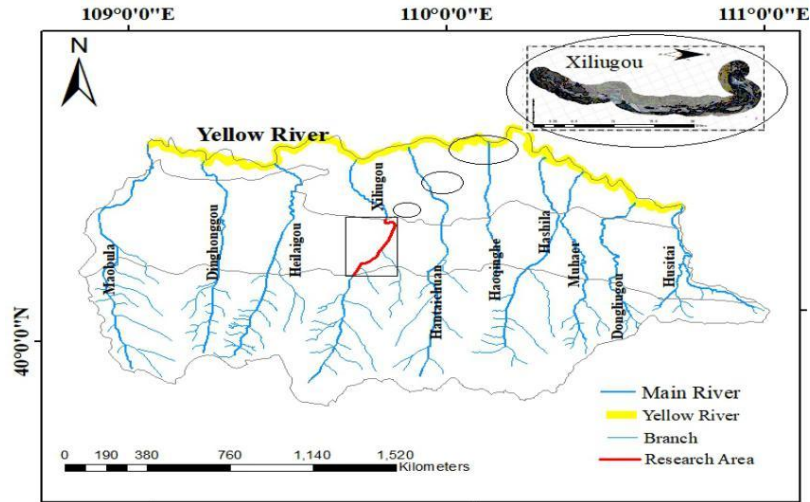

Fig.1 Location of the Xiliugou Tributary

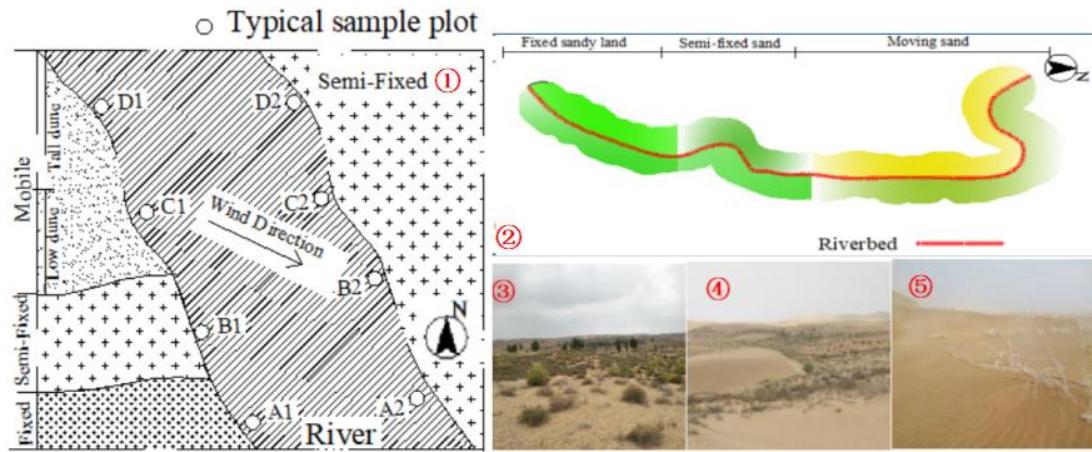

①Schematic layout of sample site;②Vegetation cover characteristics of underlying surface;③Fixed sand;④Semi-fixed sand;⑤Mobile sand

Fig.2 Observation point location layout and underlying surface feature diagram

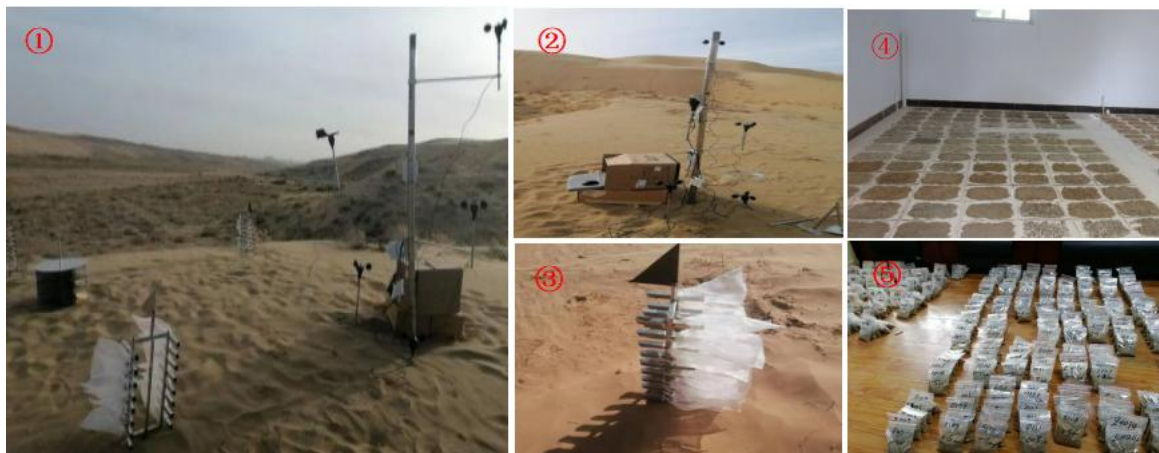

①Observation field instrument layout;② weather station(HOBO);③Sand collector;④~⑤Soil sample

Fig. 3 Schematic diagram of instrument layout in observation site

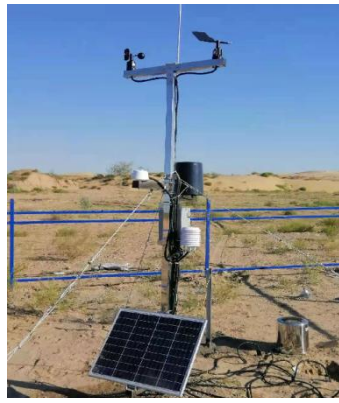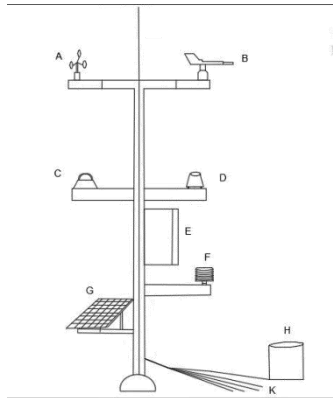

- A: Wind cup**
- B: Weather vane**
- C: Solar radiation sensor**
- D: Rainfall sensor**
- E: Data acquisition box**
- F: Humidity sensor**
- G: Solar panel**
- H: Evaporation sensor**
- K: Geothermal sensor**

Fig. 4 Operational monitoring indicators of automatic weather stations

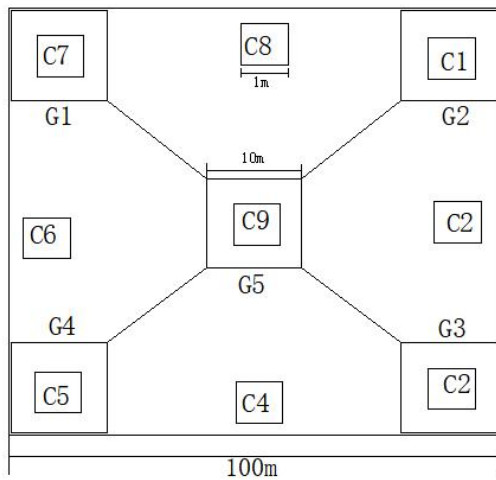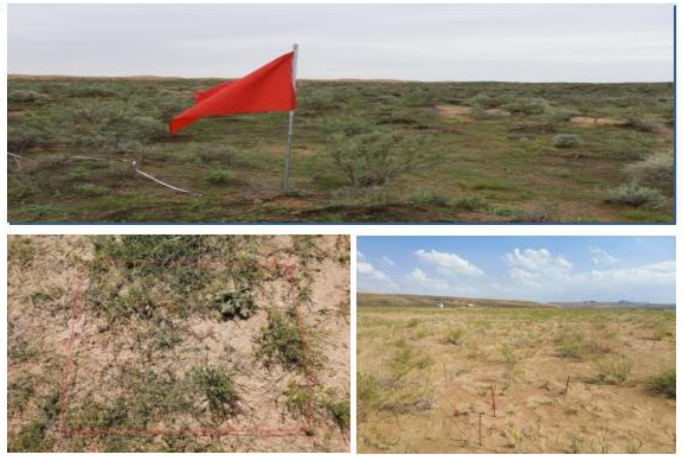

①Diagram of quadrat((C1-9: Herbaceous quadrat; G1-5 Shrub quadrat));②sample selection; ③ Herb quadrat; ④ Shrub quadrat  
Fig.5 Plot layout and survey

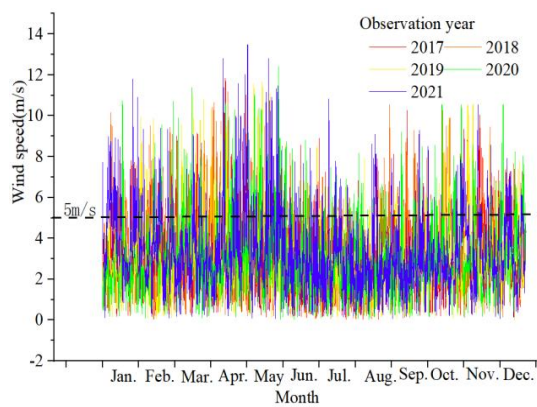

1-a. Annual wind speed variation characteristics

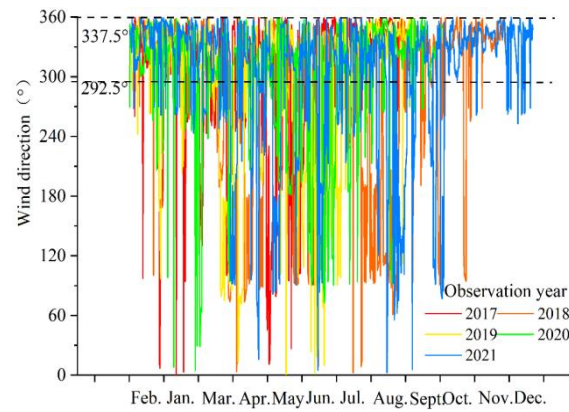

1-b. Characteristics of sand wind direction

Fig. 6 Chart of sand driving wind speed and wind direction variation in the study area



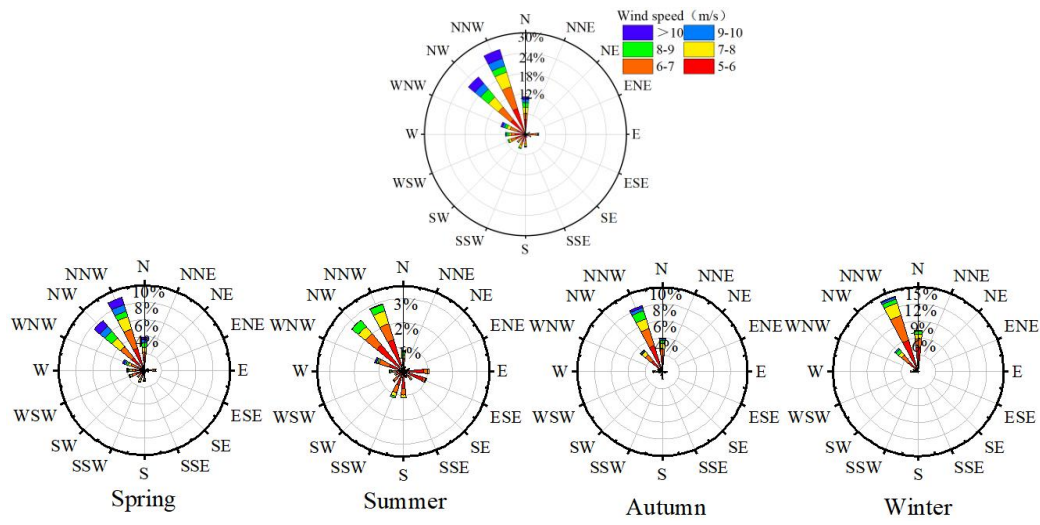

Fig. 7 Rose charts of annual and seasonal sand-driving wind conditions in the study area

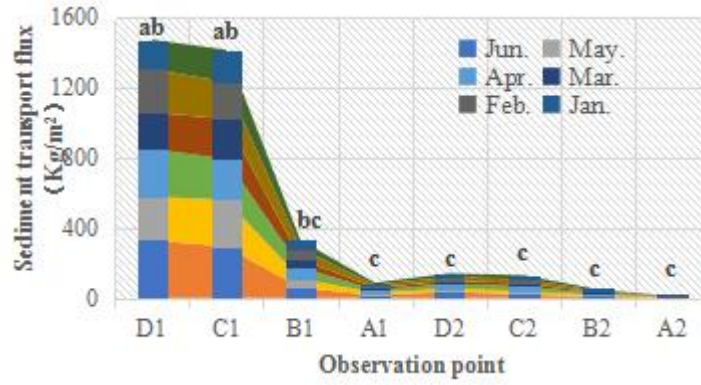

Note: Different lowercase letters a.b.c indicate differences; The capital letter A.B.C.D indicates the monitoring site number (the same below).

Fig. 8 Variation characteristics of sediment flux on unit section of different underlying surfaces

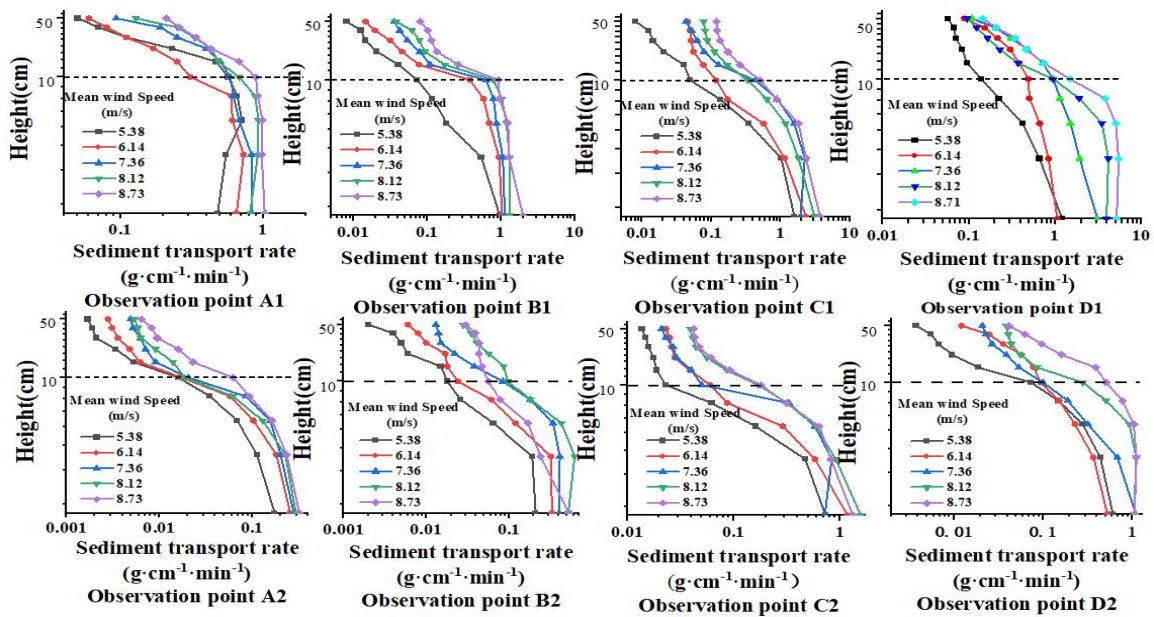

Fig. 9 Vertical line variation of pore conversion and sediment transport rate within 0~50cm height

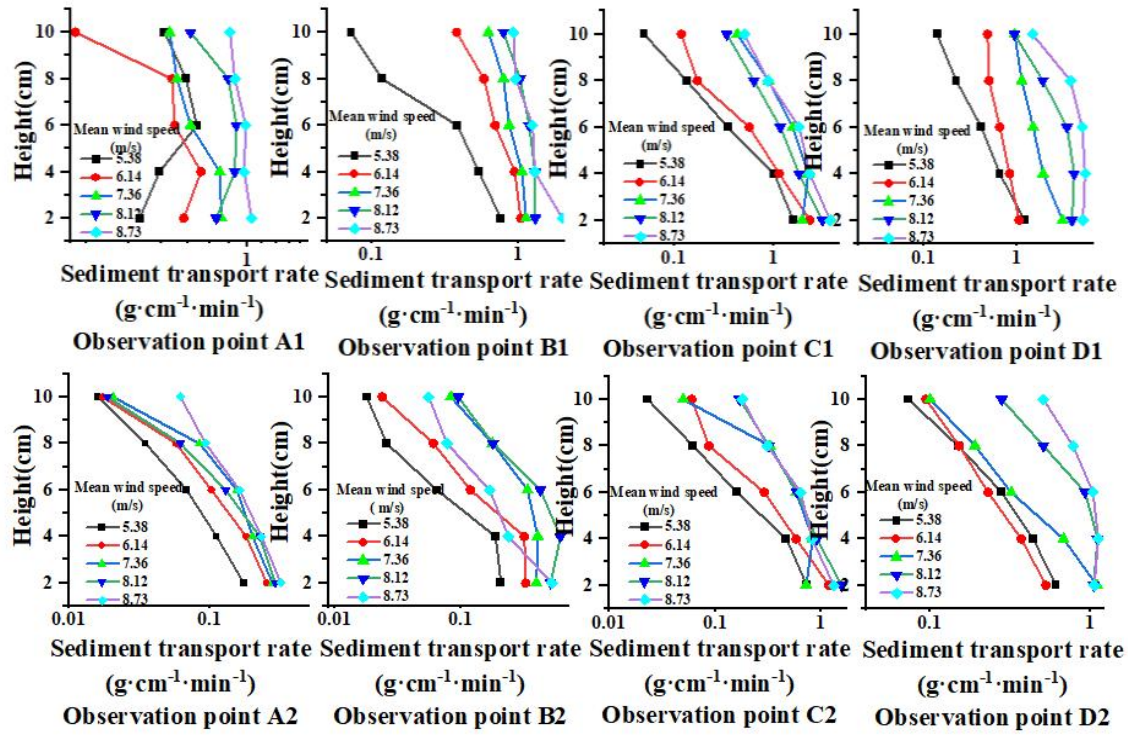

Fig. 10 Vertical line variation of pore conversion and transport rate within 0~10cm height

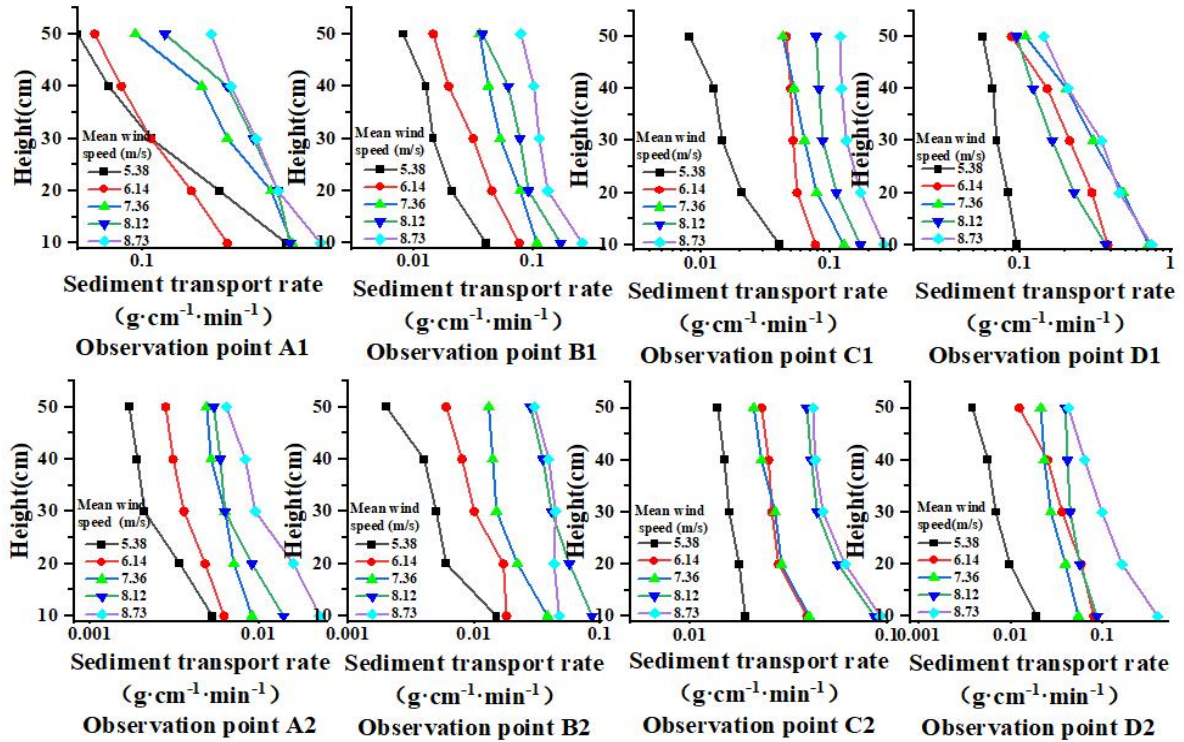

Fig. 11 Vertical variation of pore conversion and sediment transport rate within 10 to 50cm height



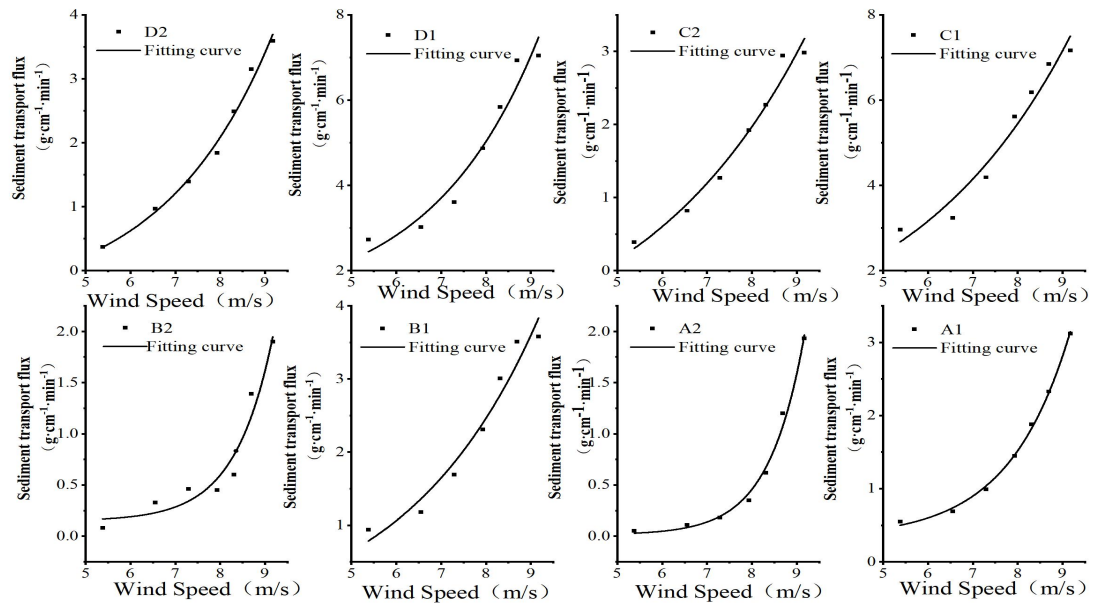

Fig. 12 Variation trend of downwind sediment transport rate on different underlying surfaces

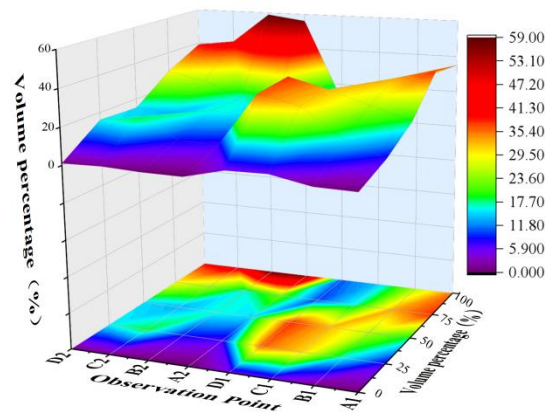

Fig. 13 Characteristics of wind-eroded sand particle size on different underlying surfaces

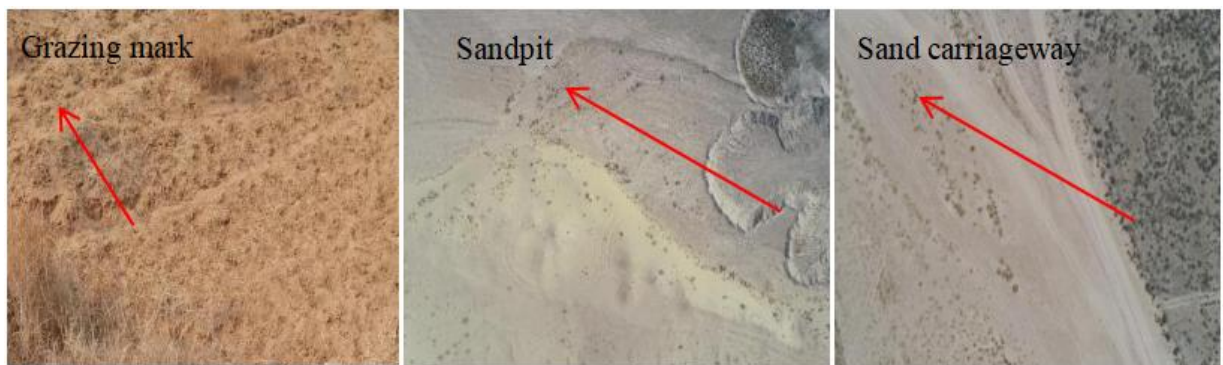

Fig. 14 Factors affecting human activities

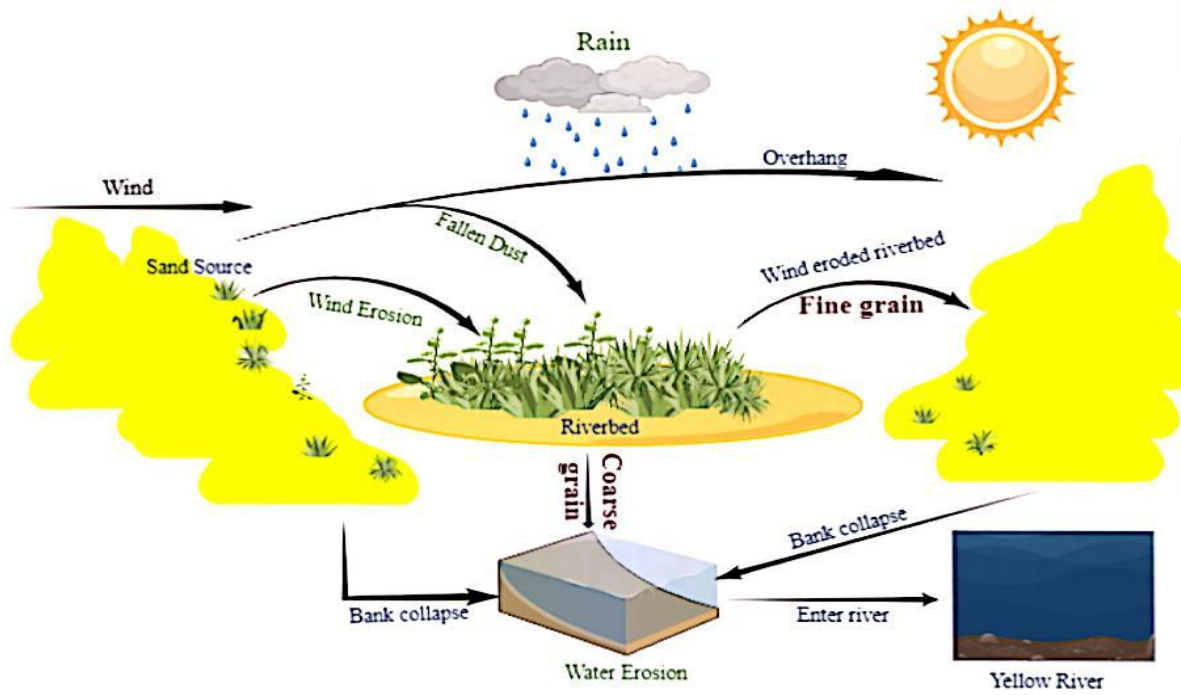

Fig. 15 Schematic diagram of wind-eroded sand deposition process in the channel

Tab. 1 The underlying surface characteristics of the study area

| Characteristic            | Site type                |            | Fixed sandy land                                                                              | Semi-fixed sandy                                         | Moving sandy land |           |
|---------------------------|--------------------------|------------|-----------------------------------------------------------------------------------------------|----------------------------------------------------------|-------------------|-----------|
| Community characteristics | Community type           | Unit       | <i>Caragana korshinskii</i><br>+ <i>Artemisia ordosica</i> – <i>Corispermum hyssopifolium</i> | <i>Artemisia ordosica</i> – <i>Psammochloa villosa</i> r | -                 |           |
|                           |                          |            | Quantity                                                                                      | Strain                                                   | 14~23             | 16~23     |
|                           |                          | Height     | m                                                                                             | 0.55~1.76                                                | 0.37~0.71         | 0.55~0.73 |
|                           |                          | Major axis | m                                                                                             | 0.77~4.12                                                | 0.31~1.16         | 0.74~1.48 |
|                           |                          | Minor axis | m                                                                                             | 0.69~3.18                                                | 0.28~1.01         | 0.54~1.38 |
|                           |                          | Coverage   | %                                                                                             | 30.81~44.42                                              | 19.37~27.52       | -         |
|                           | Riverbed characteristics |            | Width                                                                                         | m                                                        | 0.35              | 0.38      |
|                           |                          | Length     | m                                                                                             | 2.27                                                     | 5.49              | 10.37     |
|                           |                          | Area       | km <sup>2</sup>                                                                               | 0.99                                                     | 0.97              | 5.37      |

Tab. 2 The fitting function of total sediment transport rate and wind speed on different underlying surfaces

| Type of underlying surface | Point     | Formula            | Correlation coefficient R <sup>2</sup> |                         |
|----------------------------|-----------|--------------------|----------------------------------------|-------------------------|
| Fixed sandy land           | A1        | y = 0.065e0.4778x  | R <sup>2</sup> = 0.9619                |                         |
|                            | A2        | y = 0.0002e0.9792x | R <sup>2</sup> = 0.9656                |                         |
| Semi-fixed sand            | B1        | y = 0.1294e0.3987x | R <sup>2</sup> = 0.9653                |                         |
|                            | B2        | y = 0.0016e0.7539x | R <sup>2</sup> = 0.9216                |                         |
| Moving sand                | Low dune  | C1                 | y = 0.6421e0.267x                      | R <sup>2</sup> = 0.9506 |
|                            |           | C2                 | y = 0.0201e0.5644x                     | R <sup>2</sup> = 0.9845 |
|                            | High dune | D1                 | y = 0.714e0.2867x                      | R <sup>2</sup> = 0.9317 |
|                            |           | D2                 | y = 0.0071e0.5955x                     | R <sup>2</sup> = 0.9849 |
